# Supplementary material for: Coordinated regulation of core and accessory genes in the multipartite genome of Sinorhizobium fredii
Source: PubMed Central journal article supplement (PMC5991415; doi:10.1371/journal.pgen.1007428), 2018-05-24
Supplement: pgen.1007428.s011.pdf [file pgen.1007428.s011.pdf]

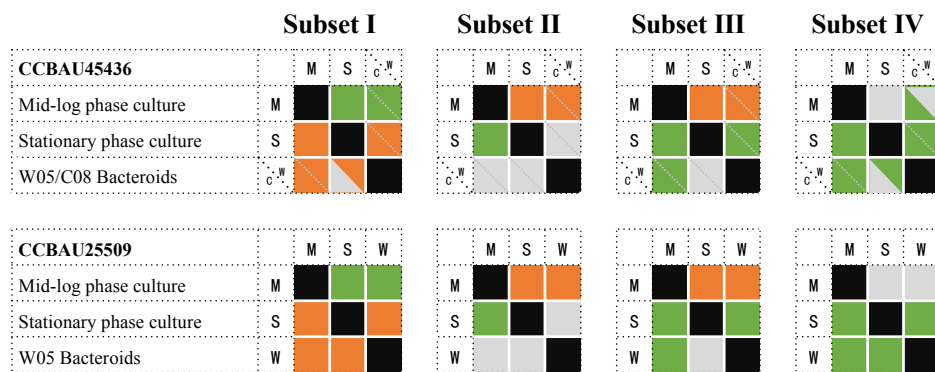

**S3 Fig. Condition-dependent enrichment of differentially expressed genes in hierarchical core/accessory subsets.** All of the differentially expressed genes based on pairwise comparisons are defined as up-regulated genes of condition.column/condition.row (or equivalent to down-regulated genes of condition.row/condition.column;  $\log_2R > 1.732$ ,  $FDR < 0.001$ ). Significant enrichment/depletion are indicated by orange/green color (Pearson's chi-square test, all  $P < 0.05$ ).
