# Supplementary material for: Coordinated regulation of core and accessory genes in the multipartite genome of Sinorhizobium fredii
Source: PubMed Central journal article supplement (PMC5991415; doi:10.1371/journal.pgen.1007428), 2018-05-24
Supplement: pgen.1007428.s013.pdf [file pgen.1007428.s013.pdf]

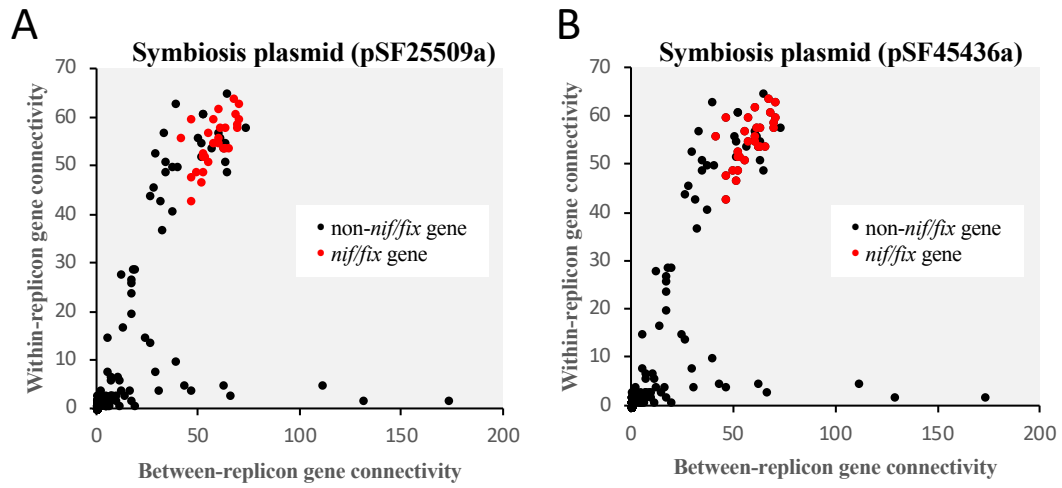

**S5 Fig. Within- and between-replicon gene connectivity related to genes on the symbiosis plasmid in the co-expression networks constructed by using WGCNA. Multi-copy genes except one out of two *nifHDK* copies were not included in these analyses.**
