# Supplementary material for: Coordinated regulation of core and accessory genes in the multipartite genome of Sinorhizobium fredii
Source: PubMed Central journal article supplement (PMC5991415; doi:10.1371/journal.pgen.1007428), 2018-05-24
Supplement: pgen.1007428.s014.pdf [file pgen.1007428.s014.pdf]

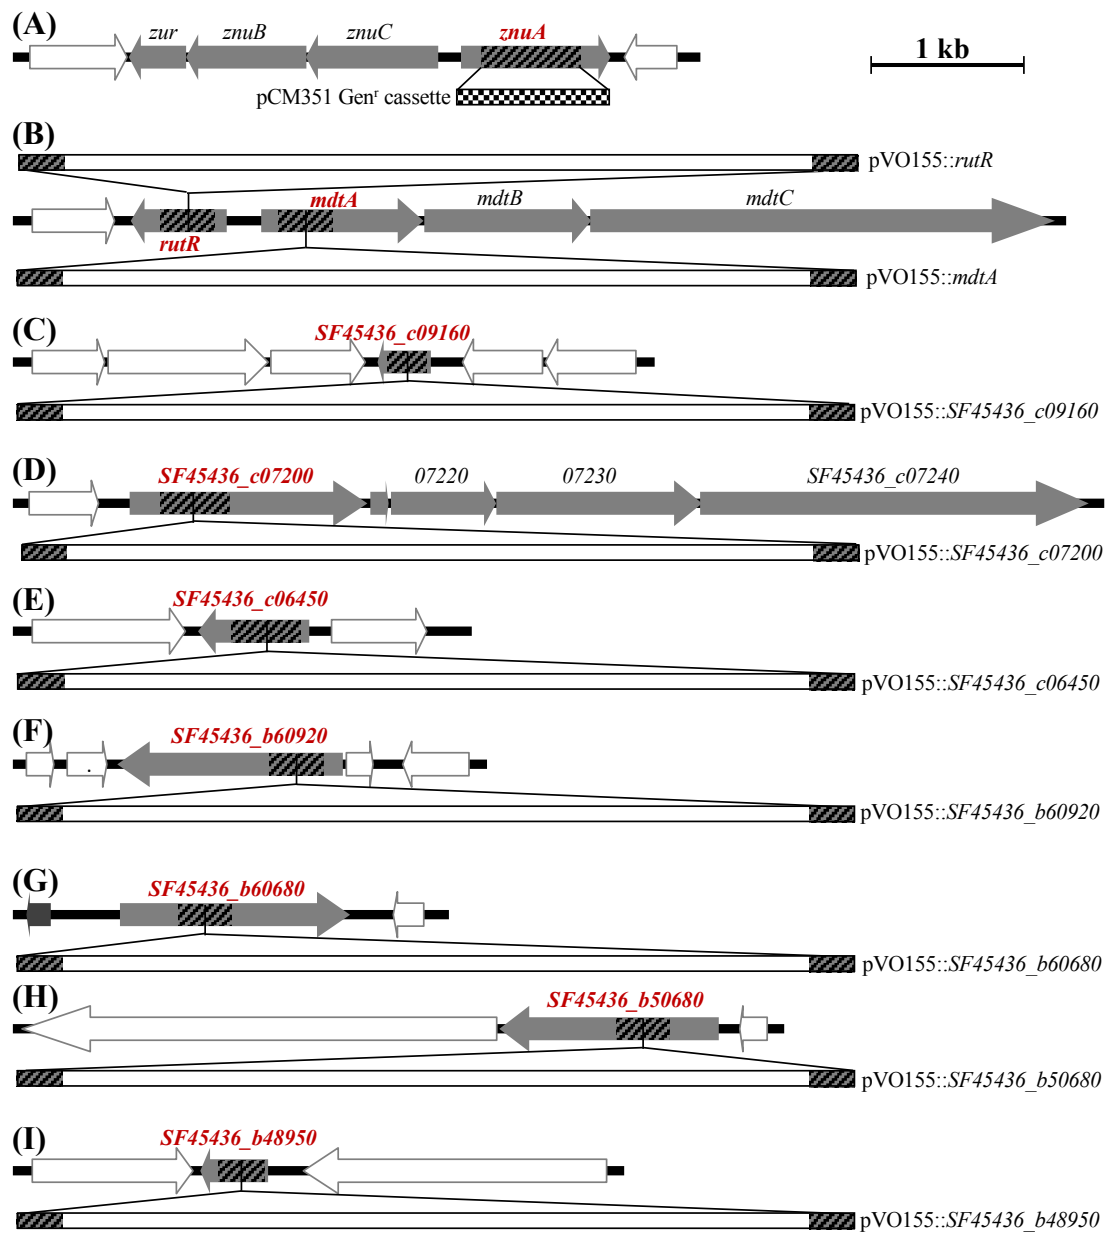

S6 Fig. Schematic diagrams illustrating the construction of mutants derived from *S. fredii* CCBAU45436.
